# Supplementary material
Source: HighWire-hosted journal article supplement (https://bibliotheek.ehb.be/content/58/3/168)
Supplement: inline-supplementary-material-3 [file inline-supplementary-material-3.pdf]

**Supplementary table 2 Summary of whole exome sequencing data from two patients with the SYCP2L variant.**

| Sample ID                                        | Family P0001 | Family P0005 |
|--------------------------------------------------|--------------|--------------|
|                                                  | IV-2         | IV-2         |
| Raw bases (Mb)                                   | 19890.63     | 19270.79     |
| Clean bases (Mb)                                 | 19878.65     | 18218.58     |
| Clean data rate (%)                              | 99.94        | 94.54        |
| Clean read1 Q20 (%)                              | 97.98        | 98.52        |
| Clean read2 Q20 (%)                              | 95.91        | 96.46        |
| Clean read1 Q30 (%)                              | 91.33        | 95.80        |
| Clean read2 Q30 (%)                              | 87.08        | 91.40        |
| Bases in target region (bp)                      | 60456963     | 60456963     |
| Total effective bases (Mb)                       | 11546.40     | 84346114     |
| Effective sequences on target (Mb)               | 7934.22      | 8058.02      |
| Capture specificity (%)                          | 68.72        | 64.49        |
| Mapping rate on genome (%)                       | 99.86        | 99.42        |
| Average sequencing depth on target               | 131.24       | 133.29       |
| Fraction of target region covered $\geq 4X$ (%)  | 99.60        | 99.58        |
| Fraction of target region covered $\geq 10X$ (%) | 99.26        | 99.24        |
| Fraction of target region covered $\geq 20X$ (%) | 97.94        | 97.15        |
| GC (%)                                           | 51.53        | 53.95        |
